# Supplementary material
Source: publisher figshare collection journal article supplement (https://gsapubs.figshare.com/ndownloader/files/23313458)
Supplement: Supplementary file 1 [file 23313458]

## Sheet: TABLE DR3
TABLE DR3. LA-ICPMS Zircon U-Pb ages For Quartz Diorite, Dioritic enclaves, Hornblendite And Dolerite Dikes From the Laohuashan Pluton, North Qilian
Spot	Th	U	Th/U	207Pb/206Pb	207Pb/206Pb	207Pb/235U	207Pb/235U	206Pb/238U	206Pb/238U	207Pb/206Pb	207Pb/206Pb	207Pb/235U	207Pb/235U	206Pb/238U	206Pb/238U	Concordance	Comment	Ti-in-zircon
	(ppm)	(ppm)			1sigma		1sigma		1sigma	Age (Ma)	1sigma	Age (Ma)	1sigma	Age (Ma)	1sigma			thermometer
QLS10-1 Quartz diorite (XX: 103°48'53.61", YY: 37°4'37")
QLS10-1-01	228.086	336.486	0.677847	0.0580591	0.00320536	0.539428	0.0298528	0.0674156	0.00108225	531.52	122.205	438.047	19.6927	420.567	6.53993	95%		892.22
QLS10-1-02	260.696	408.256	0.638561	0.0567972	0.00311659	0.57366	0.0315673	0.0733495	0.00101121	483.375	122.205	460.379	20.3708	456.304	6.0782	99%		852.05
QLS10-1-03	299.385	515.368	0.580914	0.0548396	0.00227906	0.506132	0.0199262	0.0676386	0.000889616	405.605	92.5825	415.845	13.4365	421.913	5.37634	98%		807.804
QLS10-1-04	305.553	525.894	0.581016	0.054214	0.0024253	0.503399	0.0225907	0.0673119	0.000842712	388.94	99.99	414	15.2602	419.94	5.09491	98%		810.578
QLS10-1-05	300.157	422.445	0.710523	0.0564095	0.00284849	0.520912	0.0250327	0.0677314	0.000981866	477.82	111.1	425.761	16.7147	422.473	5.93239	99%		813.208
QLS10-1-06	331.451	584.232	0.567328	0.0586506	0.00249938	0.57746	0.0238845	0.071605	0.000944008	553.74	99.06	462.828	15.3773	445.818	5.68393	96%		801.597
QLS10-1-07	425.043	852.061	0.498841	0.0563193	0.00208568	0.540318	0.0210896	0.0689858	0.000892018	464.86	78.695	438.634	13.9055	430.042	5.38424	98%		721.404
QLS10-1-08	227.979	414.751	0.549677	0.056303	0.00290622	0.541601	0.0276247	0.0693346	0.000967162	464.86	114.805	439.48	18.1976	432.146	5.83514	98%		770.376
QLS10-1-09	918.8	1105.42	0.831175	0.0556769	0.0022596	0.544609	0.0223787	0.0708096	0.000877518	438.935	90.7325	441.459	14.7142	441.032	5.28814	99%		761.173
QLS10-1-10	341.006	524.029	0.650739	0.0556034	0.00266357	0.518094	0.0230819	0.0680323	0.000883218	435.23	105.545	423.877	15.4411	424.29	5.33583	99%		768.442
QLS10-1-11	363.572	546.351	0.665455	0.0522386	0.00234928	0.496962	0.0225515	0.0689497	0.000960507	294.505	101.838	409.644	15.2992	429.825	5.79709	95%		788.577
QLS10-1-12	304.385	487.702	0.62412	0.0567327	0.00230692	0.526618	0.0208823	0.0675863	0.000901563	479.67	90.73	429.563	13.8923	421.597	5.44867	98%		868.044
QLS10-1-13	345.825	558.181	0.619558	0.0531448	0.00242638	0.506567	0.0230773	0.0693384	0.000932472	344.5	103.692	416.138	15.556	432.168	5.62617	96%		834.15
QLS10-1-14	485.587	613.3	0.791761	0.053876	0.00231745	0.518959	0.0231139	0.0694612	0.00097388	364.87	98.1375	424.456	15.4537	432.909	5.87493	98%		754.605
QLS10-1-15	285.026	467.106	0.610194	0.0612831	0.00271921	0.586574	0.0258365	0.0697093	0.00101223	650.015	96.2825	468.678	16.538	434.404	6.10454	92%		839.249
QLS10-1-16	1099.37	1062.52	1.03	0.0761589	0.00261764	0.67247	0.0232611	0.0636875	0.000622812	1099.08	68.83	522.213	14.1266	398.012	3.78063	73%	Delete	875.607
QLS10-1-17	445.879	702.969	0.63428	0.0583674	0.00220907	0.544288	0.0199803	0.0675577	0.000784596	542.63	87.95	441.248	13.1407	421.425	4.74322	95%		842.808
QLS10-1-18	404.235	534.519	0.75626	0.0579801	0.00264242	0.553899	0.0250201	0.0690337	0.000936352	527.815	96.125	447.547	16.352	430.332	5.6511	96%		854.922
QLS10-1-19	328.745	566.992	0.579805	0.0621509	0.00304375	0.585	0.0285353	0.0681163	0.000892946	679.64	108.317	467.67	18.283	424.797	5.39409	90%		830.463
QLS10-1-20	619.61	725.137	0.854473	0.0573066	0.0025041	0.544464	0.0238094	0.0687032	0.000898378	501.89	96.2825	441.363	15.656	428.338	5.42395	97%		806.279
QLS10-1-21	321.399	679.604	0.47292	0.0615414	0.00228538	0.606266	0.0225737	0.071677	0.000892731	657.42	84.245	481.202	14.2735	446.251	5.37541	92%		663.331
QLS10-1-22	488.115	684.436	0.713163	0.0572453	0.00209799	0.543197	0.0197299	0.0688721	0.000897344	501.89	86.1	440.53	12.9852	429.357	5.41688	97%		786.719
QLS10-1-23	519.148	693.935	0.748122	0.0569894	0.00220237	0.537197	0.0212816	0.067933	0.000823764	500.04	54.625	436.575	14.0605	423.691	4.97778	97%		798.763
QLS10-1-24	361.94	673.601	0.537322	0.0555056	0.00216734	0.515569	0.0199644	0.0671951	0.000797194	431.53	87.0275	422.187	13.3786	419.235	4.82078	99%		742.478
QLS10-1-25	321.564	505.089	0.636648	0.0600753	0.00266424	0.570419	0.0258331	0.0688419	0.000971459	605.575	96.2825	458.285	16.7058	429.175	5.86366	93%		794.305
QLS11-1 Dioritic enclave (XX: 103°48'45.86", YY: 37°4'35.36")
QLS11-1-01	370.494	549.908	0.673738	0.0577174	0.00190363	0.546641	0.017739	0.0687837	0.000725368	520.41	67.585	442.794	11.6497	428.824	4.38121	96%		863.332
QLS11-1-02	328.081	479.38	0.684386	0.056456	0.00171533	0.53683	0.0156292	0.0693999	0.000711017	477.82	66.6575	436.332	10.3305	432.539	4.29242	99%		866.808
QLS11-1-03	235.392	360.591	0.652795	0.0567896	0.00239831	0.549231	0.0227736	0.0699774	0.000911066	483.375	92.5825	444.493	14.9291	436.019	5.49405	98%		806.529
QLS11-1-04	374.014	519.608	0.7198	0.0553152	0.00213983	0.532165	0.0201969	0.0698316	0.000700578	433.38	82.4	433.245	13.388	435.141	4.22796	99%		732.36
QLS11-1-05	259.447	391.829	0.662144	0.0581613	0.00208556	0.555869	0.0186925	0.0695231	0.000705085	600.025	79.615	448.834	12.2028	433.282	4.25625	96%		750.818
QLS11-1-06	372.222	586.658	0.634479	0.0554227	0.00217044	0.523002	0.020111	0.068477	0.000847297	427.825	91.6575	427.155	13.4111	426.974	5.11717	99%		796.377
QLS11-1-07	495.668	514.737	0.962953	0.0559699	0.00223091	0.531441	0.0204915	0.0686631	0.000773648	450.045	88.88	432.766	13.5895	428.096	4.67254	98%		860.743
QLS11-1-08	442.496	662.012	0.668411	0.0551742	0.00181953	0.52335	0.0165213	0.0686238	0.000691482	420.42	78.695	427.387	11.016	427.859	4.17772	99%		827.632
QLS11-1-09	305.43	464.315	0.657807	0.0591692	0.00269753	0.563882	0.0242858	0.069504	0.000945936	572.255	130.537	454.05	15.7711	433.167	5.70641	95%		857.639
QLS11-1-10	300.792	386.825	0.777593	0.0595899	0.00246171	0.569673	0.0224319	0.0696111	0.000853482	587.065	88.875	457.803	14.514	433.813	5.14916	94%		771.649
QLS11-1-11	294.262	408.423	0.720483	0.0564879	0.00232567	0.533932	0.0208816	0.0686315	0.000791952	472.265	92.5825	434.416	13.8257	427.906	4.78296	98%		848.388
QLS11-1-12	266.371	395.931	0.67277	0.0561688	0.00246491	0.527465	0.0217015	0.0687679	0.000895122	457.45	93.51	430.126	14.4291	428.729	5.40401	99%		873.464
QLS11-1-13	343.92	564.57	0.609172	0.0552323	0.00198064	0.52415	0.0185544	0.068429	0.000699368	420.42	79.6225	427.92	12.3643	426.684	4.22595	99%		850.725
QLS11-1-14	475.989	514.952	0.924336	0.0553023	0.00193942	0.533309	0.0188556	0.0695687	0.00078201	433.38	79.62	434.004	12.49	433.556	4.71908	99%	core	869.94
QLS11-1-15	260.525	408.511	0.637743	0.0585588	0.00238365	0.553542	0.0219078	0.0688951	0.000885135	550.035	90.7275	447.314	14.322	429.496	5.34321	95%	rim	871.378
QLS11-1-16	316.5	450.887	0.701949	0.05758	0.00230294	0.544854	0.0212558	0.0685403	0.000807011	522.26	82.395	441.62	13.974	427.355	4.8741	96%		839.433
QLS11-1-17	265.723	362.167	0.733703	0.0564625	0.0027797	0.541869	0.0267812	0.0694308	0.00088671	477.82	104.62	439.656	17.639	432.726	5.3501	98%		881.784
QLS11-1-18	300.005	469.267	0.639307	0.0550998	0.00230993	0.520801	0.0210411	0.0683766	0.000832139	416.715	92.5825	425.686	14.0514	426.368	5.02627	99%		877.517
QLS11-1-19	353.566	493.366	0.716642	0.0564961	0.00232477	0.532996	0.0204343	0.0689466	0.000928052	472.265	86.1025	433.796	13.5379	429.806	5.60154	99%		840.136
QLS11-1-20	334.688	643.178	0.520367	0.0568971	0.00179965	0.540719	0.0171408	0.0685334	0.000779484	487.08	74.9925	438.898	11.3003	427.314	4.70825	97%		851.04
QLS11-1-21	629.005	637.101	0.987293	0.0572531	0.00225174	0.543355	0.0215335	0.0686752	0.000888218	501.89	87.0275	440.634	14.1702	428.169	5.36286	97%		867.814
QLS11-1-22	220.563	385.946	0.571488	0.0566579	0.00424843	0.562659	0.0367888	0.0695686	0.00124287	479.67	166.645	453.256	23.9066	433.556	7.49457	95%		813.367
QLS11-1-23	539.954	622.643	0.867197	0.0581353	0.0024339	0.556038	0.0240217	0.0688007	0.000780276	600.025	97.2075	448.944	15.6782	428.926	4.71189	95%		827.063
QLS11-1-24	255.114	522.992	0.487797	0.0558434	0.00230031	0.526796	0.0197497	0.0686161	0.000846979	455.6	124.985	429.681	13.1376	427.812	5.11461	99%		843.44
QLS11-1-25	338.148	587.66	0.575415	0.0533509	0.00242008	0.520287	0.0218568	0.0700508	0.000904168	342.65	101.843	425.343	14.6008	436.462	5.45216	97%		874.346
QLS11-1-26	249.086	348.787	0.714152	0.0564953	0.00275347	0.547689	0.0277755	0.0695703	0.000950687	472.265	107.397	443.482	18.225	433.567	5.73468	97%		875.793
QLS11-1-27	298.56	512.287	0.5828	0.0552433	0.00228241	0.530479	0.0208792	0.0696821	0.000853625	420.42	97.2125	432.127	13.8552	434.24	5.14969	99%		852.27
QLS11-1-28	284.153	489.869	0.58006	0.0483226	0.00235174	0.493274	0.0245144	0.0743261	0.00116032	122.31	111.09	407.139	16.6714	462.166	6.96691	87%	Delete	819.409
QLS11-1-29	269.563	481.459	0.559888	0.0562544	0.00216319	0.538178	0.0198184	0.0698991	0.000961032	461.155	85.175	437.223	13.0859	435.548	5.79524	99%		812.052
QLS11-3 Dioritic enclave (XX: 103°48'25.2", YY: 37°4'26.4")
QLS11-3-01	287.001	437.275	0.656339	0.0575065	0.00229049	0.54174	0.0202015	0.068712	0.000765672	509.3	87.025	439.571	13.308	428.391	4.62428	97%		832.523
QLS11-3-02	571.1	571.424	0.999433	0.0554062	0.00186588	0.525404	0.0178313	0.068558	0.000614408	427.825	75.9175	428.755	11.8729	427.462	3.71379	99%		786.819
QLS11-3-03	416.818	455.2	0.915681	0.0560549	0.00234749	0.553895	0.0231192	0.0717756	0.000948215	453.75	89.805	447.545	15.1102	446.844	5.70833	99%	core	758.888
QLS11-3-04	352.418	647.974	0.543877	0.0556456	0.00202747	0.53121	0.0181867	0.0695546	0.000774492	438.935	81.4725	432.612	12.0636	433.472	4.67388	99%	rim	779.314
QLS11-3-05	320.871	576.546	0.55654	0.0574929	0.00204115	0.547142	0.0196953	0.0686682	0.000752357	509.3	77.7675	443.123	12.9294	428.127	4.54425	96%		803.311
QLS11-3-06	401.433	634.299	0.632876	0.056631	0.00191801	0.543083	0.0187606	0.0691179	0.000738354	475.97	41.6625	440.455	12.3486	430.839	4.45809	97%		864.494
QLS11-3-07	356.026	704.375	0.505449	0.055569	0.00169544	0.529121	0.0169323	0.0688251	0.000820465	435.23	68.51	431.226	11.2474	429.073	4.9539	99%		845.145
QLS11-3-08	807.753	867.628	0.93099	0.0549048	0.00209394	0.54255	0.0198914	0.0715559	0.00075083	409.31	89.805	440.104	13.0969	445.523	4.52335	98%	core	757.621
QLS11-3-09	319.86	827.965	0.386321	0.0562999	0.00152769	0.533711	0.0144511	0.068788	0.000724619	464.86	28.7	434.269	9.57183	428.85	4.37668	98%	rim	747.642
QLS11-3-10	373.597	698.799	0.534627	0.055506	0.00184663	0.526772	0.0172835	0.0688558	0.000673064	431.53	69.4375	429.665	11.4981	429.259	4.06595	99%		845.905
QLS11-3-11	354.514	701.664	0.505247	0.0555149	0.00191307	0.530099	0.0181286	0.0690923	0.000673404	431.53	77.77	431.875	12.0338	430.685	4.06714	99%		840.648
QLS11-3-12	341.671	638.375	0.53522	0.055556	0.00204361	0.527155	0.0187372	0.0689193	0.000843709	435.23	86.1025	429.92	12.4615	429.641	5.0935	99%		822.245
QLS11-3-13	307.881	397.824	0.773912	0.0558476	0.00216206	0.533429	0.0208003	0.0694238	0.000844127	455.6	82.4	434.083	13.7764	432.683	5.0937	99%		808.291
QLS11-3-14	345.623	700.086	0.493686	0.0568674	0.00264338	0.529824	0.0236053	0.0688036	0.000913659	487.08	99.0625	431.693	15.6702	428.944	5.51554	99%		783.79
QLS11-3-15	244.79	368.17	0.664883	0.0570949	0.00320432	0.538568	0.0286592	0.069317	0.00113496	494.485	124.055	437.48	18.9161	432.039	6.84611	98%		805.567
QLS11-3-16	356.654	642.174	0.555384	0.0555592	0.00235302	0.534851	0.0235277	0.0698425	0.000904957	435.23	91.6575	435.024	15.5676	435.207	5.45795	99%		734.697
QLS11-3-17	866.278	1358.84	0.637511	0.0734662	0.00169037	1.5863	0.0364199	0.156553	0.0014814	1027.78	41.6675	964.846	14.3135	937.593	8.27256	97%	core	864.857
QLS11-3-18	314.802	567.34	0.554873	0.0550328	0.00207433	0.519893	0.0204434	0.0685832	0.000909065	413.01	83.325	425.08	13.6605	427.614	5.48895	99%		827.603
QLS11-3-19	1328.04	1315.59	1.00946	0.0540161	0.00237642	0.508722	0.0220674	0.0684521	0.000782035	372.275	72.215	417.589	14.8543	426.823	4.72396	97%		807.521
QLS11-3-20	353.843	550.7	0.642533	0.0551494	0.00241226	0.52044	0.0226766	0.0686315	0.00084731	416.715	102.767	425.445	15.1467	427.906	5.11653	99%		811.014
QLS11-3-21	385.919	882.196	0.437452	0.0556422	0.00187283	0.531589	0.017704	0.069442	0.000687448	438.935	80.5475	432.864	11.7408	432.793	4.15041	99%		893.522
QLS11-3-22	325.849	704.179	0.462736	0.0565651	0.00194629	0.534114	0.01757	0.0689995	0.000819406	475.97	75.9175	434.537	11.6328	430.125	4.94674	98%		882.443
QLS11-3-23	290.943	550.531	0.528478	0.0566212	0.00243607	0.532544	0.0225758	0.0685801	0.000895726	475.97	89.805	433.497	14.9604	427.595	5.40857	98%		755.199
QLS12-2-1 Hornblendite (XX: 103°48'28.8", YY: 37°4'24.1")
QLS12-2-1-01	859.063	851.337	1.00907	0.054777	0.00197575	0.546411	0.0185874	0.0724148	0.00088806	466.71	81.4725	442.643	12.2083	450.687	5.34378	98%
QLS12-2-1-02	1296.11	1169.71	1.10806	0.0557196	0.00158613	0.557598	0.0153657	0.0722065	0.000669576	442.64	62.955	449.962	10.0214	449.436	4.03299	99%
QLS12-2-1-03	871.113	906.734	0.960715	0.0577014	0.00180246	0.573152	0.0175466	0.0718283	0.000847159	516.705	65.7325	460.051	11.3297	447.161	5.10088	97%
QLS12-2-1-04	2168.45	1640.19	1.32207	0.0542715	0.001423	0.543151	0.0142239	0.0720916	0.000672604	383.385	57.4025	440.5	9.36404	448.745	4.05157	98%
QLS12-2-1-05	1041.35	1012.12	1.02887	0.0556389	0.00178601	0.561127	0.0185244	0.0725643	0.000800541	438.935	72.215	452.26	12.0525	451.586	4.81765	99%
QLS12-2-1-06	1986.17	1415.45	1.4032	0.0524733	0.00144649	0.51759	0.0140144	0.0711306	0.000561653	305.615	62.955	423.54	9.38112	442.964	3.38866	95%
QLS12-2-1-07	869.192	1195	0.727359	0.0547881	0.00139243	0.547635	0.0142564	0.0722227	0.000794379	466.71	57.4025	443.446	9.35828	449.533	4.78213	98%
QLS12-2-1-08	737.929	936.847	0.787674	0.0541779	0.00147944	0.539665	0.0135444	0.0722618	0.000686794	388.94	61.105	438.204	8.93729	449.768	4.13613	97%
QLS12-2-1-09	641.271	678.327	0.945371	0.0560788	0.00232623	0.554198	0.0225915	0.07166	0.000780714	453.75	92.5825	447.743	14.7625	446.149	4.70245	99%
QLS12-2-1-10	1578.39	1301.66	1.2126	0.0560144	0.00219245	0.55473	0.0209062	0.0715284	0.000722637	453.75	87.0275	448.09	13.6571	445.357	4.3541	99%
QLS12-2-1-11	482.642	581.291	0.830293	0.0562814	0.00240183	0.552915	0.0214392	0.0715321	0.000728252	464.86	94.435	446.904	14.0214	445.38	4.38781	99%
QLS12-2-1-12	430.013	525.559	0.818202	0.057629	0.00243231	0.571285	0.0239161	0.0720455	0.00103251	516.705	92.5775	458.845	15.458	448.467	6.21342	97%
QLS12-2-1-13	575.772	872.957	0.659566	0.0555576	0.00172284	0.550059	0.017161	0.0715156	0.000782416	435.23	68.51	445.035	11.2456	445.28	4.71328	99%
QLS12-2-1-14	817.82	956.216	0.855267	0.0582876	0.00182031	0.576014	0.0172217	0.0718396	0.000949022	538.925	68.5075	461.897	11.0999	447.229	5.71285	96%
QLS12-2-1-15	1624.66	1260.89	1.2885	0.0556365	0.00144512	0.551787	0.0149496	0.0715724	0.000852288	438.935	52.7725	446.167	9.78667	445.622	5.13288	99%
QLS12-2-1-16	295.709	429.235	0.688922	0.0557996	0.00222077	0.565987	0.0252359	0.0727205	0.00107598	442.64	88.88	455.416	16.3658	452.525	6.47061	99%
QLS12-2-1-17	386.1	496.848	0.777099	0.0574462	0.00291065	0.577503	0.0306553	0.0722087	0.0012171	509.3	111.095	462.855	19.7343	449.448	7.32154	97%
QLS12-2-1-18	478.941	551.682	0.868147	0.0573496	0.00219147	0.571141	0.0212925	0.0721662	0.000881244	505.595	83.3225	458.752	13.7643	449.193	5.30404	97%
QLS12-2-1-19	777.679	763.612	1.01842	0.0577338	0.00218942	0.570944	0.0208952	0.0716036	0.000774989	520.41	87.95	458.625	13.5093	445.809	4.66829	97%
QLS12-2-1-20	789.374	1261.1	0.625941	0.0560568	0.00156622	0.559322	0.0149937	0.0722095	0.00071533	453.75	62.9575	451.085	9.76826	449.453	4.3076	99%
QLS06-1 Dolerite dike (XX: 103°54'3.4", YY: 37°2'54.68")
QLS06-1-01	459.347	835.362	0.549878	0.0557568	0.00213169	0.532063	0.0194758	0.0691766	0.000791798	442.64	85.175	433.178	12.9111	431.193	4.77968	99%
QLS06-1-02	312.419	402.534	0.776132	0.0560229	0.00267385	0.528694	0.0215958	0.0689107	0.000882608	453.75	112.025	430.942	14.3473	429.59	5.32791	99%
QLS06-1-03	353.011	582.34	0.606193	0.0562278	0.00298995	0.534677	0.02541	0.0686972	0.000857551	461.155	118.507	434.909	16.8145	428.302	5.17794	98%
QLS06-1-04	873.647	1734.86	0.503582	0.0557783	0.00169107	0.555658	0.0142121	0.0720837	0.000819951	442.64	66.66	448.696	9.28131	448.697	4.9363	99%
QLS06-1-05	154.358	314.941	0.490117	0.0554144	0.00336007	0.522249	0.0313301	0.0682036	0.00120455	427.825	139.8	426.652	20.9001	425.324	7.27288	99%
QLS06-1-06	452.05	988.966	0.457094	0.0560429	0.00155923	0.563416	0.0164838	0.0724062	0.000841914	453.75	65.735	453.747	10.7101	450.636	5.06673	99%
QLS06-1-07	348.204	573.406	0.607256	0.0553032	0.00251593	0.523054	0.0214061	0.0686582	0.000810102	433.38	101.84	427.189	14.2739	428.067	4.8922	99%
QLS06-1-08	1329.2	1394.8	0.952968	0.0687425	0.00156336	1.39973	0.0349026	0.146429	0.00161879	900	48.1475	888.821	14.7805	880.914	9.11491	99%
QLS06-1-09	847.112	1088.1	0.778525	0.0553372	0.00271136	0.520499	0.0213508	0.0680511	0.000716765	433.38	104.62	425.484	14.2609	424.403	4.33223	99%
QLS06-1-10	261.716	1754.37	0.14918	0.0689415	0.00169326	1.38828	0.0329672	0.145483	0.0014874	898.15	45.37	883.967	14.029	875.595	8.38397	99%
QLS06-1-11	160.817	193.814	0.829752	0.0662129	0.00422219	1.19372	0.065803	0.130934	0.00207408	812.96	135.178	797.683	30.4624	793.192	11.8302	99%
QLS06-1-12	168.454	286.259	0.588468	0.0556546	0.00300368	0.544479	0.0266148	0.0709509	0.000996784	438.935	115.73	441.374	17.4998	441.882	6.00472	99%
QLS06-1-13	1058.73	824.806	1.28361	0.0692422	0.00179457	1.44585	0.0374487	0.150882	0.00164677	905.555	53.395	908.152	15.5589	905.903	9.23699	99%
QLS06-1-14	974.657	1120.58	0.869779	0.056446	0.00158661	0.597579	0.0169499	0.0764641	0.000720726	477.82	62.9575	475.696	10.7778	474.983	4.32369	99%
QLS06-1-15	166.168	365.583	0.454529	0.0566416	0.00271005	0.556529	0.0244644	0.0718253	0.00105811	475.97	110.172	449.265	15.962	447.143	6.36848	99%
QLS06-1-16	398.645	635.683	0.627112	0.0551911	0.00217924	0.515527	0.0190016	0.0673406	0.00087031	420.42	88.88	422.159	12.7341	420.114	5.2613	99%
QLS06-1-17	1080.4	1050.94	1.02803	0.10083	0.00196866	4.00795	0.081059	0.286136	0.00264702	1639.19	36.575	1635.81	16.4727	1622.19	13.2963	99%
QLS06-1-18	511.362	935.406	0.546674	0.0892376	0.00285108	2.69084	0.0567107	0.216148	0.00212224	1409.26	61.4225	1325.94	15.6277	1261.49	11.2699	95%
QLS06-1-19	689.578	819.051	0.841923	0.0541328	0.00200184	0.523224	0.0153263	0.0683737	0.00076148	375.98	78.695	427.303	10.2207	426.35	4.60042	99%
QLS06-1-20	152.701	346.258	0.441005	0.0559324	0.00368827	0.530722	0.0336528	0.0689858	0.00115422	450.045	148.132	432.289	22.3251	430.043	6.96427	99%
